# Supplementary material
Source: Springer Nature journal article supplement (https://www.springermedizin.de/resource/supplementary/12943_2013_1214_MOESM9_ESM.pdf/9552416)

**A****pre-miR-193a**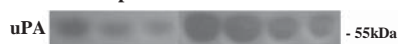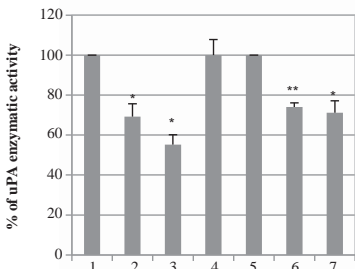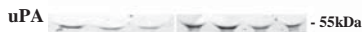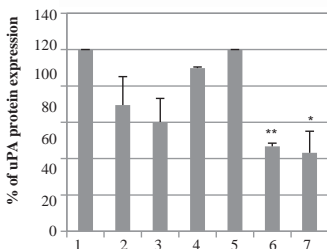

1. Lipofectamine 48h
2. 50 nM miR-193a 48h
3. 100 nM miR-193a 48h
4. SKHep1C3 72h
5. Lipofectamine 72h
6. 50 nM miR-193a 72h
7. 100 nM miR-193a 72h

**B****anti-miR-193a**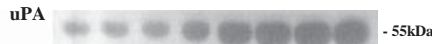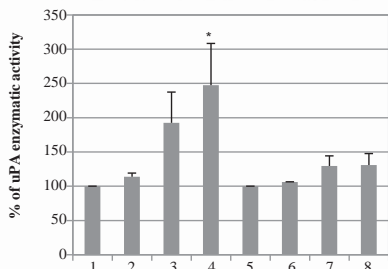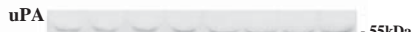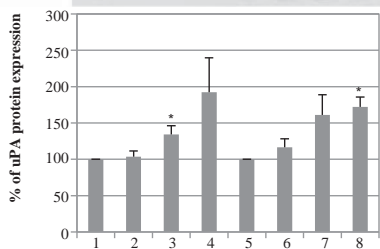

1. SKHep1C3 48h
2. Lipofectamine 48h
3. anti-miR-193a 50 nM 48h
4. anti-miR-193a 100 nM 48h
5. SKHep1C3 72h
6. Lipofectamine 72h
7. anti-miR-193a 50 nM 72h
8. anti-miR-193a 100 nM 72h

**C**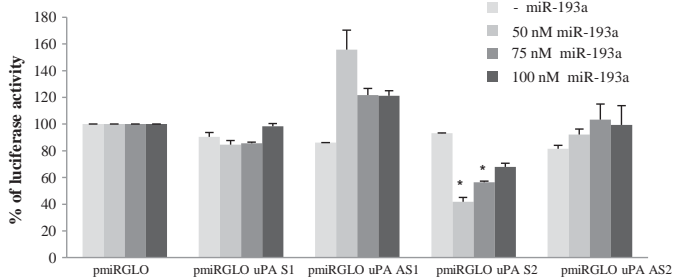

Supplement: MOESM9 [file 9552416]
